# Supplementary material
Source: PubMed Central journal article supplement (PMC7470783)
Supplement: mmc1.pdf [file mmc1.pdf]

## Supplemental Information

### Human B Cell Clonal Expansion and Convergent Antibody Responses to SARS-CoV-2

**Sandra C.A. Nielsen, Fan Yang, Katherine J.L. Jackson, Ramona A. Hoh, Katharina Röltgen, Grace H. Jean, Bryan A. Stevens, Ji-Yeun Lee, Arjun Rustagi, Angela J. Rogers, Abigail E. Powell, Molly Hunter, Javaria Najeeb, Ana R. Otrelo-Cardoso, Kathryn E. Yost, Bence Daniel, Kari C. Nadeau, Howard Y. Chang, Ansuman T. Satpathy, Theodore S. Jardetzky, Peter S. Kim, Taia T. Wang, Benjamin A. Pinsky, Catherine A. Blish, and Scott D. Boyd**

## Supplemental Information

**Table S1. IgG and IgA subclass proportions, Related to Figure 2.** COVID-19 and healthy human control (HHC) median isotype subclass proportions +/- median absolute deviation (MAD) summarized for all samples within each group. p-values were calculated by two-sided Wilcoxon–Mann-Whitney tests.

|       | COVID-19 (median +/- MAD) | HHC (median +/- MAD) | Two-sided Wilcoxon–Mann-Whitney test |
|-------|---------------------------|----------------------|--------------------------------------|
| IGHA1 | 70.1 +/- 9.3              | 65 +/- 6.6           | p-value = 0.2018                     |
| IGHA2 | 29.9 +/- 9.4              | 35 +/- 6.6           | p-value = 0.2018                     |
| IGHG1 | 69.2 +/- 11.5             | 41.4 +/- 7.3         | p-value = 9.114e-09                  |
| IGHG2 | 16.3 +/- 11.2             | 40.2 +/- 8.5         | p-value = 8.855e-08                  |
| IGHG3 | 8.7 +/- 3.3               | 14.6 +/- 5.9         | p-value = 6.281e-05                  |
| IGHG4 | 0.3 +/- 0.2               | 1.6 +/- 1.9          | p-value = 0.003414                   |

**Table S2. Heavy and light chain sequence features for convergent monoclonal antibodies (mAbs) 2A and 4A, Related to Figure 3.** The percent identity (ID %) of the IGHV, IGKV or IGLV gene sequence relative to germline is shown.

| mAb   | IGHV          | IGHD        | IGHJ     | IGHC  | IGHV ID (%) | CDR-H3 AA          | IGK/LV      | IGK/LJ             | IGK/LV ID (%) | CDR-L3 AA |
|-------|---------------|-------------|----------|-------|-------------|--------------------|-------------|--------------------|---------------|-----------|
| mAb2A | IGHV3-30-3*01 | IGHD3-22*01 | IGHJ3*02 | IGHG1 | 99.7        | ARDSGSAFDI         | IGLV3-1*01  | IGLJ2*01, IGLJ3*01 | 100           | QAWDSSTVV |
| mAb4A | IGHV3-15*01   | IGHD3-16*02 | IGHJ4*02 | IGHM  | 100         | TTDRHYDYVWGSYRYPDY | IGKV1-39*01 | IGKJ5*01           | 100           | QQSYSTPT  |

**Table S3. First round PCR primer sequences for isotype and gDNA libraries for Illumina high-throughput sequencing, Related to STAR METHODS.**

| Primer name                            | Sequence (5'-3')                                                         |
|----------------------------------------|--------------------------------------------------------------------------|
| <b>Isotype/gDNA FR1 primers</b>        |                                                                          |
| IGHV1                                  | GGCATTCCCTGCTGAACCGCTCTTCCGATCT[8nt barcode]GGCCTCAGTGAAGGTCTCCTGCAAG    |
| IGHV2                                  | GGCATTCCCTGCTGAACCGCTCTTCCGATCT[8nt barcode]GTCTGGTCCCTACGCTGGTGAAACCC   |
| IGHV3                                  | GGCATTCCCTGCTGAACCGCTCTTCCGATCT[8nt barcode]CTGGGGGGTCCCTGAGACTCTCCTG    |
| IGHV4                                  | GGCATTCCCTGCTGAACCGCTCTTCCGATCT[8nt barcode]CTTCGGAGACCCTGTCCCTCACCTG    |
| IGHV5                                  | GGCATTCCCTGCTGAACCGCTCTTCCGATCT[8nt barcode]CGGGGAGTCTCTGAAGATCTCCTGT    |
| IGHV6                                  | GGCATTCCCTGCTGAACCGCTCTTCCGATCT[8nt barcode]TCGCAGACCCTCTCACTCACCTGTG    |
| <b>gDNA FR2 primers</b>                |                                                                          |
| IGHV1                                  | GGCATTCCCTGCTGAACCGCTCTTCCGATCT[8nt barcode]CTGGGTGCGACAGGCCCTGGACAA     |
| IGHV2                                  | GGCATTCCCTGCTGAACCGCTCTTCCGATCT[8nt barcode]TGATCCGTCAGCCCCCAGGGAAGG     |
| IGHV3                                  | GGCATTCCCTGCTGAACCGCTCTTCCGATCT[8nt barcode]GGTCCGCCAGGCTCCAGGGAA        |
| IGHV4                                  | GGCATTCCCTGCTGAACCGCTCTTCCGATCT[8nt barcode]TGATCCGCCAGCCCCCAGGGAAGG     |
| IGHV5                                  | GGCATTCCCTGCTGAACCGCTCTTCCGATCT[8nt barcode]GGGTGCGCCAGATGCCCGGGAAAGG    |
| IGHV6                                  | GGCATTCCCTGCTGAACCGCTCTTCCGATCT[8nt barcode]TGATCAGGCAGTCCCCATCGAGAG     |
| IGHV7                                  | GGCATTCCCTGCTGAACCGCTCTTCCGATCT[8nt barcode]TTGGGTGCGACAGGCCCTGGACAA     |
| <b>Isotype constant region primers</b> |                                                                          |
| IgA                                    | ACACTCTTTCCCTACACGACGCTCTTCCGATCTNNNN[8nt barcode]GAAGACCTTGGGGCTGGT     |
| IgD                                    | ACACTCTTTCCCTACACGACGCTCTTCCGATCTNNNN[8nt barcode]CCCTGATATGATGGGGAACA   |
| IgE                                    | ACACTCTTTCCCTACACGACGCTCTTCCGATCTNNNN[8nt barcode]GAAGACGGATGGGCTCTGT    |
| IgG                                    | ACACTCTTTCCCTACACGACGCTCTTCCGATCTNNNN[8nt barcode]TTCGGGGAAGTAGTCTTGA    |
| IgM                                    | ACACTCTTTCCCTACACGACGCTCTTCCGATCTNNNN[8nt barcode]GGGAATTCTCACAGGAGACG   |
| <b>gDNA IGHJ primer</b>                |                                                                          |
| IGHJ                                   | ACACTCTTTCCCTACACGACGCTCTTCCGATCTNNNN[8nt barcode]CTTACCTGAGGAGACGGTGACC |

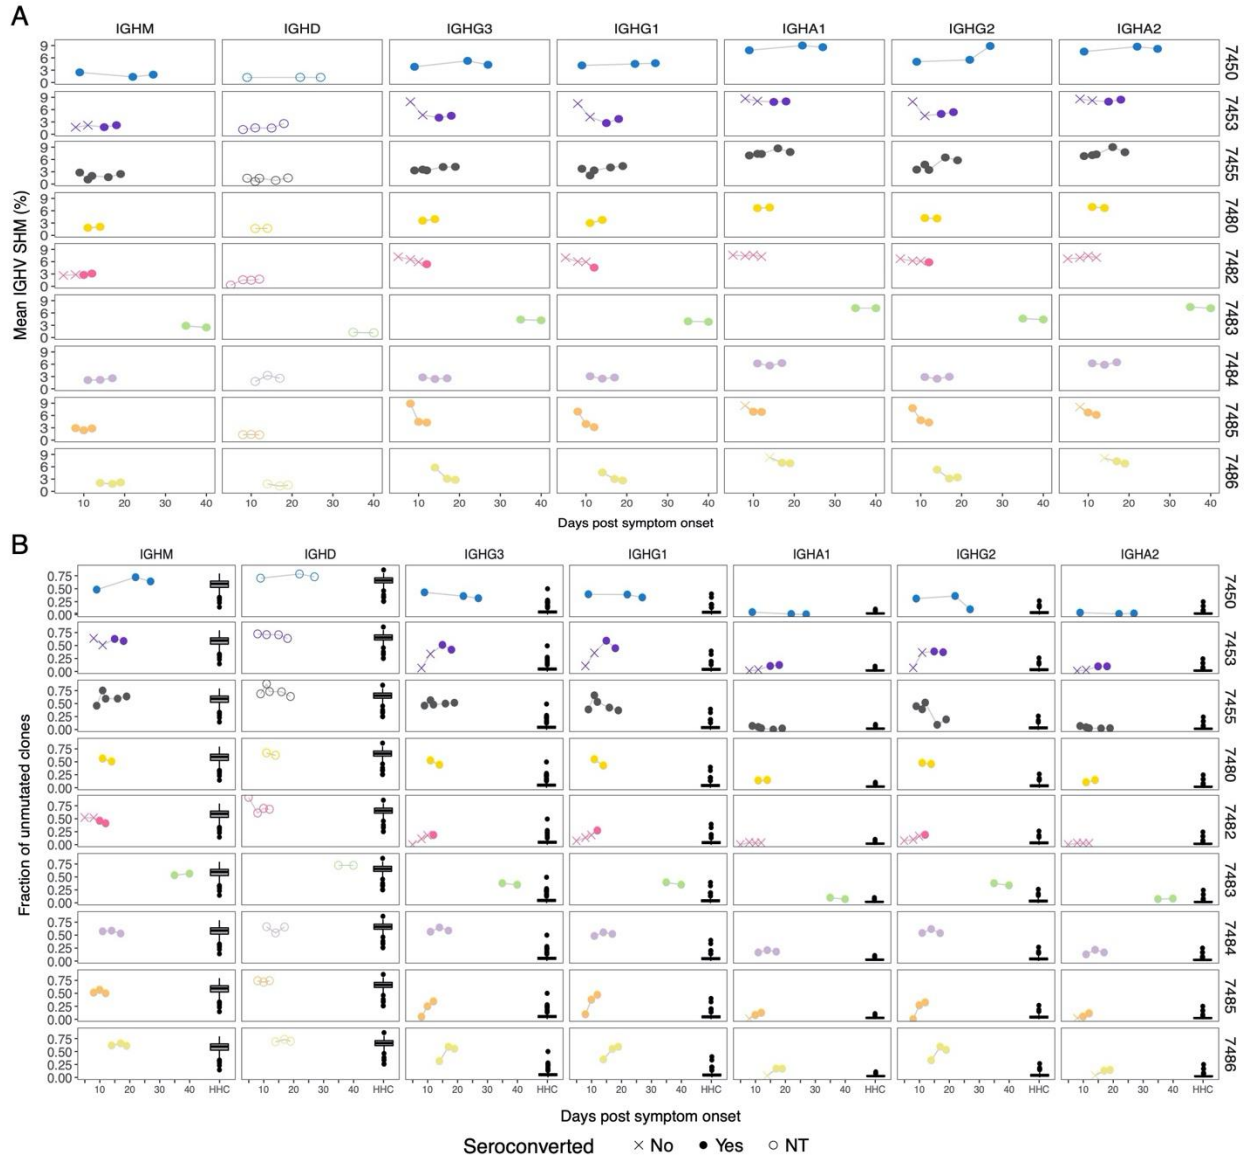

**Figure S1. Mean SHM percentage and unmutated clone fractions over time for each patient, Related to Figure 2.** (A) The average SHM (%) for the IGHV gene segment of expressed antibodies of the indicated isotype (panel column) for each individual (panel row). SHM for each isotype in each sample was summarized as the median SHM of reads expressed as the indicated isotype within each clone, then taking the mean SHM percentage over all clones. (B) The fraction of unmutated (<1% IGHV SHM, y-axis) B cell lineages for each IGH of the indicated isotype (panel column) for each individual (panel row). (A) and (B) Days post symptom onset on x-axis. Point shapes indicate seronegative (x) or seropositive (filled circle) for the isotype (IgM serology for IgM; IgG serology for IgG subclasses; and IgA serology for IgA subclasses), with gray for HHC. IgD is indicated with an open circle as serology was not tested (NT).

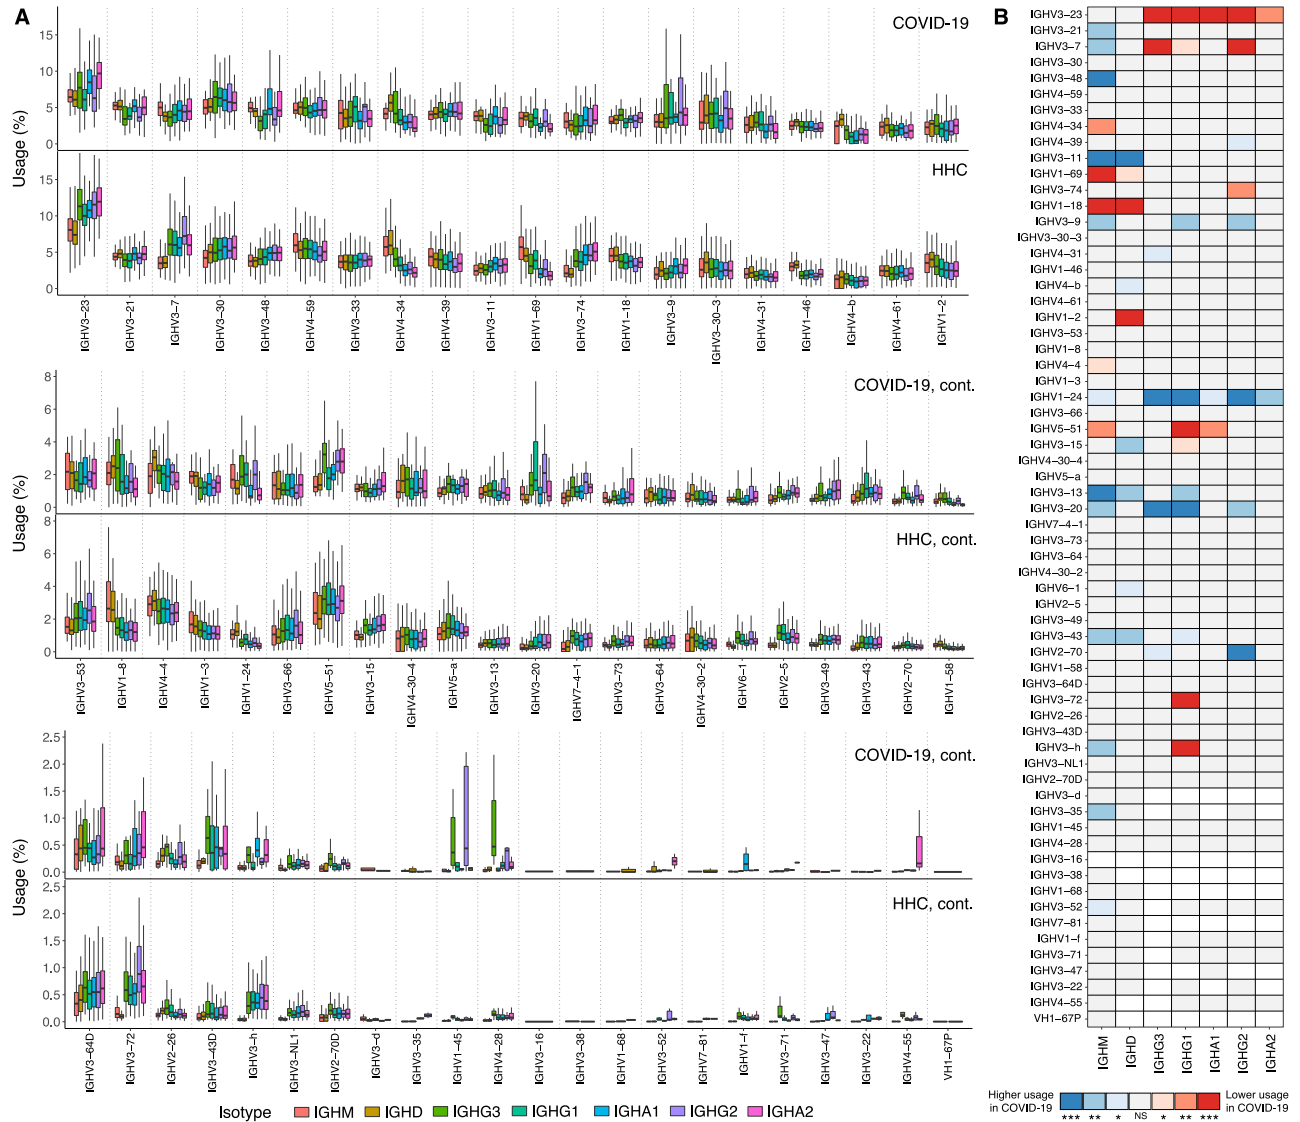

**Figure S2. IGHV usage for COVID-19 patients compared to a healthy human control (HHC) cohort, Related to Figure 2.** Median frequency of IGHV gene utilization for each isotype subclass observed for the 13 COVID-19 patients compared to a cohort of 114 HHC. **(A)** IGHV usage is shown as the median for clones within each COVID-19 patient and HHC. **(B)** Gene utilization frequencies for each isotype subclass for each IGHV gene were compared between COVID-19 and HHC (paired Wilcoxon tests with Bonferroni correction for multiple hypothesis testing). Where gene usage differed significantly between the cohorts and the gene was utilized at a higher median frequency among the COVID-19 patients the adjusted significance is shown in blue, whereas genes that differed significantly but with lower median usage for the COVID-19 patients relative to the HHC are plotted in red. Instances with insufficient data for test (only 1 or no data points) are in white. The plot y-axes were chosen to show the box-whiskers on a readable scale; rare outlier points with extreme values are not shown but were included in all analyses.

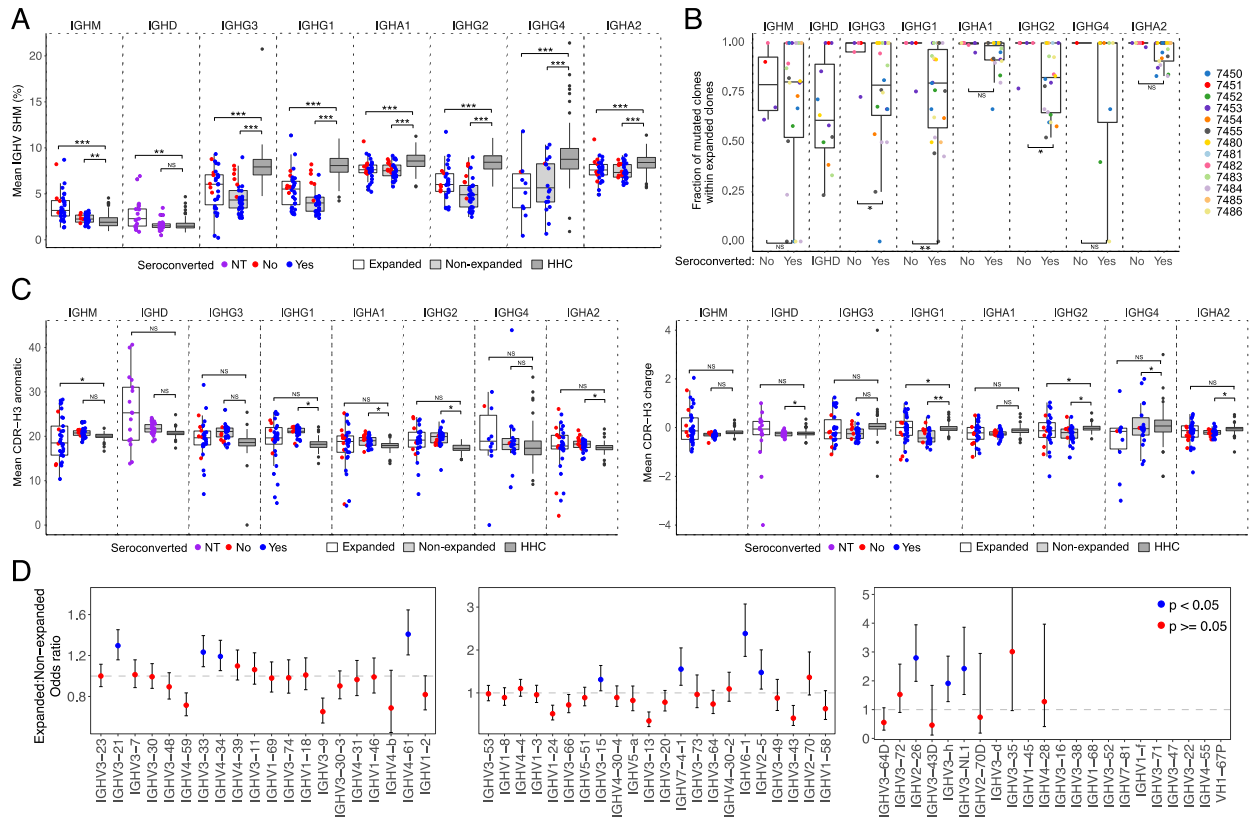

**Figure S3. IGHV gene and CDR-H3 features between expanded and non-expanded patient clones and healthy human controls (HHC), Related to Figure 2.** (A) Mean IGHV SHM of expanded and non-expanded clones in COVID-19 patients compared to HHC. SHM frequency for each isotype in each sample was summarized as the median SHM of reads expressed as the indicated isotype within each clone, then taking the mean SHM percentage over all clones. Points are jittered on the x-axis to decrease over-plotting of samples with the same value (y-axis). p-values were calculated by two-sided Wilcoxon–Mann-Whitney tests. (A) and (C) COVID-19 patient samples grouped by expanded clones (white) or non-expanded clones (light gray), and total clones from healthy human (HHC) (dark gray, only outlier points are displayed for this group). Points indicate seronegative (red) or seropositive (blue) for the isotype (IgM serology for IgM; IgG serology for IgG subclasses; and IgA serology for IgA subclasses), with gray for HHC. IgD is indicated in purple as serology was not tested (NT). (B) Fraction of mutated expanded clones (y-axis) by seroconversion status (x-axis). Points are colored by participant. p-values were calculated by Fisher’s exact tests. (C) Mean CDR-H3 charge and aromaticity of expanded clones in COVID-19 patients. Percent aromaticity (left panel) and mean charge (right panel) for CDR-H3 amino acid residues. p-values were calculated by one-way ANOVA with Tukey’s HSD test. (A–C), \*\*\*p-value < 0.001; \*\*p-value < 0.01; \*p-value  $\leq$  0.05; NS: p-value > 0.05. (D) Odds ratio (OR) of IGHV gene usage in expanded clones compared to non-expanded clones in COVID-19 patients. Each dot is the OR value for each IGHV gene, the bars represent confidence interval. The plot y-axis was chosen to show the points on a readable scale; extreme values are not shown but were included in all analyses. Each point was colored by p-value tested by Fisher’s exact test, blue: p-value < 0.05, red: p-value  $\geq$  0.05.

**A**

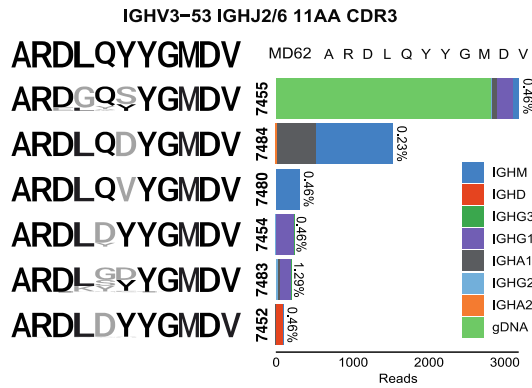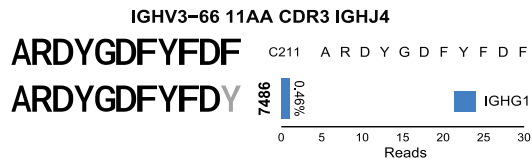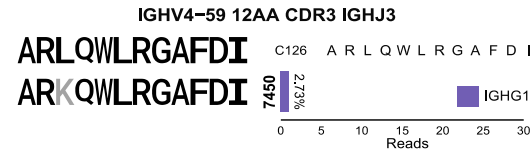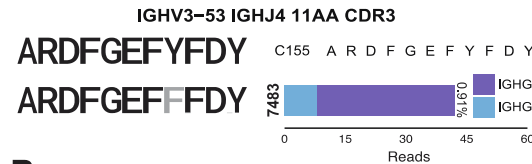

**B**

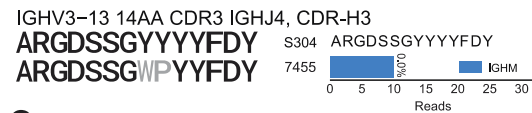

**C**

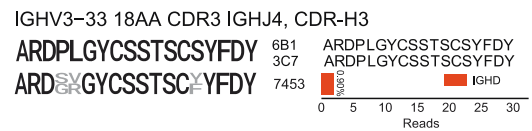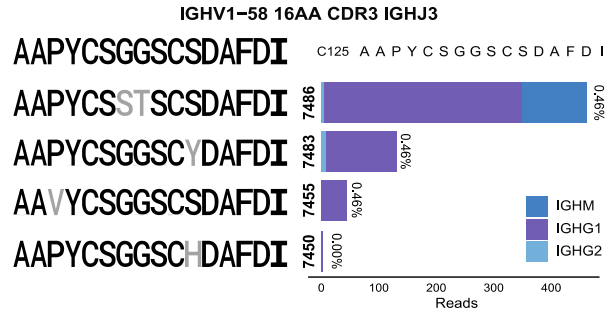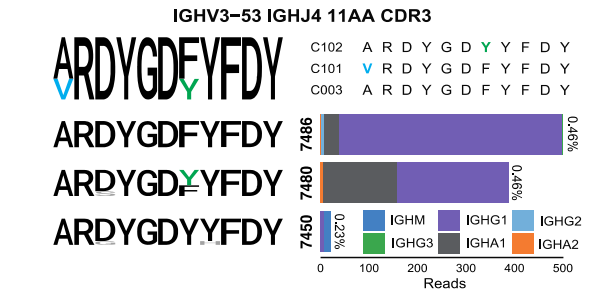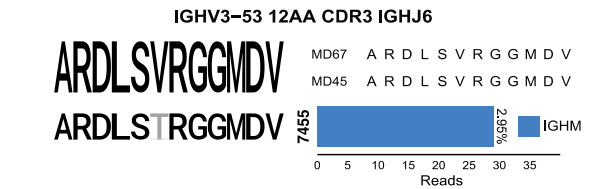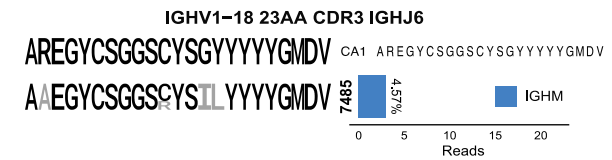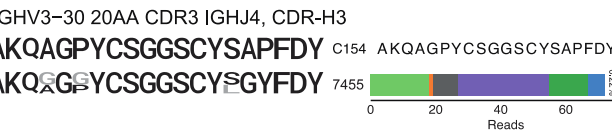

**Figure S4. Sequence logos of CDR-H3 AA residues from convergent IGHs in patients with COVID-19, Related to Figure 3.** Sequence logos of CDR-H3 AA residues from anti-SARS-CoV-2 (A), anti-SARS-CoV/CoV-2 cross-neutralizing (B) or anti-SARS-CoV (C) convergent IGHs. For each set of convergent IGH the sequence logo and alignment for the reported antigen-specific CDR-H3 is shown at the top, and sequence logos for clones from each patient are aligned below (colored black where they match a conserved residue in the reported CDR-H3, colored for non-conserved as depicted in the alignment, or gray if no match). The read count per patient that contributed to the sequence logo is plotted for each isotype, with the SHM frequency shown beside the bar.
